# Supplementary material for: Unraveling biogeographical patterns and environmental drivers of soil fungal diversity at the French national scale
Source: Copernicus journal article supplement (doi:10.5194/egusphere-2023-1552), 2023-07-27
Supplement: Supplementary file 1 [file egusphere-2023-1552-supplement.zip]

Archive with 2 entries (2 files):
- supp-figures.pdf
- tables.xlsx
