# Supplementary material for: Unraveling biogeographical patterns and environmental drivers of soil fungal diversity at the French national scale
Source: Copernicus journal article supplement (doi:10.5194/egusphere-2023-1552), 2023-07-27
Supplement: Supplementary file 1 [file tables.xlsx]

## Sheet: Supplementary Table 1
Hill number	predGridBy	autoKrigeNfold	r2	thetaMean	thetaMed	model	nugget	sill	range	lambda Boxcox transformation
Q=0	2500	100	0.059	1.009	0.436	Ste	72,114.622	85,970.101	231,223.017
Q=1	2500	100	0.057	1.004	0.465	Ste	0.495	1.291	26,855.867	0.223
Q=2	2500	100	0.039	1.009	0.439	Sph	0.208	0.267	36,303.434	0.077

## Sheet: Supplementary Table 2
	Soil and environmental variables	Q0	Q1	Q2
Climate conditions	Climate type	0.88 (p-value=0.003)	0.63 (p-value=0.036)	0.69 (p-value=0.041)
Land use	Land use	0.39 (p-value=0.061)	0.44 (p-value=0.04)	2.17 (p-value=0.001)
Spatial descriptors	Elevation*	0.26 (p-value=0.013)	0.83 (p-value=0.001)
	Latitude		0.07 (p-value=0.184)	0.31 (p-value=0.007)	x
Soil characteristics	Silt	0.65 (p-value=0.001)		0.16 (p-value=0.076)
	Clay	2.38 (p-value=0.001)	3 (p-value=0.001)
	pH†	6.72 (p-value=0.001)	6.3 (p-value=0.001)	3.19 (p-value=0.001)
	Organic carbon*			0.43 (p-value=0.001)
	Available phosphorus*	0.08 (p-value=0.195)
	Iron total			0.47 (p-value=0.002)
	Cadmium total*	0.37 (p-value=0.002)
	Lead total*	0.58 (p-value=0.001)
	Nickel total	0.53 (p-value=0.001)
	Interactions	7.25	4.25	0.12
	Residual	79.90	84.48	92.46

## Sheet: Supplementary Table 3
Land uses	Community metrics	Min	Mean	Median	Max	Sd	Kruskal-Wallis test
Forests	Number of connected vertices	3.059	3,290.73	3,290.5	3.503	86.8758	a
Grasslands	Number of connected vertices	2.469	2,892.71	2,903.5	3.235	135.1418	b
Crops	Number of connected vertices	2.519	2,891.95	2,879.5	3.259	153.4674	b
Vineyards/Orchards	Number of connected vertices	2.528	2,592.57	2.599	2.649	28.9717	c
Forests	Proportion of connected vertices	0.9619	0.9831	0.9834	0.995	0.0067	a
Grasslands	Proportion of connected vertices	0.7539	0.8563	0.8631	0.9297	0.0393	b
Crops	Proportion of connected vertices	0.7214	0.8399	0.8412	0.9332	0.0382	c
Vineyards/Orchards	Proportion of connected vertices	0.7992	0.817	0.818	0.832	0.007	d
Forests	Number of links	21.454	32,717.56	31,300.5	60.253	7,516.5896	a
Grasslands	Number of links	4.098	7,586.33	7,571.5	14.289	1,902.9024	b
Crops	Number of links	4.037	7,962.86	7.753	16.553	2,285.2859	b
Vineyards/Orchards	Number of links	4.819	5,313.9	5.332	5.685	180.8644	c
Forests	Connectance	0.0037	0.0058	0.0057	0.0105	0.0013	a
Grasslands	Connectance	0.0007	0.0013	0.0013	0.0027	0.0003	b
Crops	Connectance	0.0007	0.0013	0.0013	0.0028	0.0004	b
Vineyards/Orchards	Connectance	0.001	0.0011	0.0011	0.0011	0	c
